# Supplementary material for: Phylodynamic analysis of the highly pathogenic avian influenza H5N8 epidemic in France, 2016–2017
Source: PubMed Central journal article supplement — Transbound Emerg Dis. 2022 Mar 7;69(5):e1574–83. doi: 10.1111/tbed.14490 (PMC9790735; doi:10.1111/tbed.14490), 2022-03-07
Supplement: TBED-69-e1574-s001.pdf [file TBED-69-e1574-s001.pdf]

1 **S1 Figure.** A heat map depicting multi-collinearity between linear predictors of the viral  
2 effective population size  $N_e$  GLM. Each cube depicts the range of the Pearson correlation  
3 coefficient ( $\rho$ ) between a pair of predictors. Darker colour represents stronger positive  
4 correlation.

(S1)

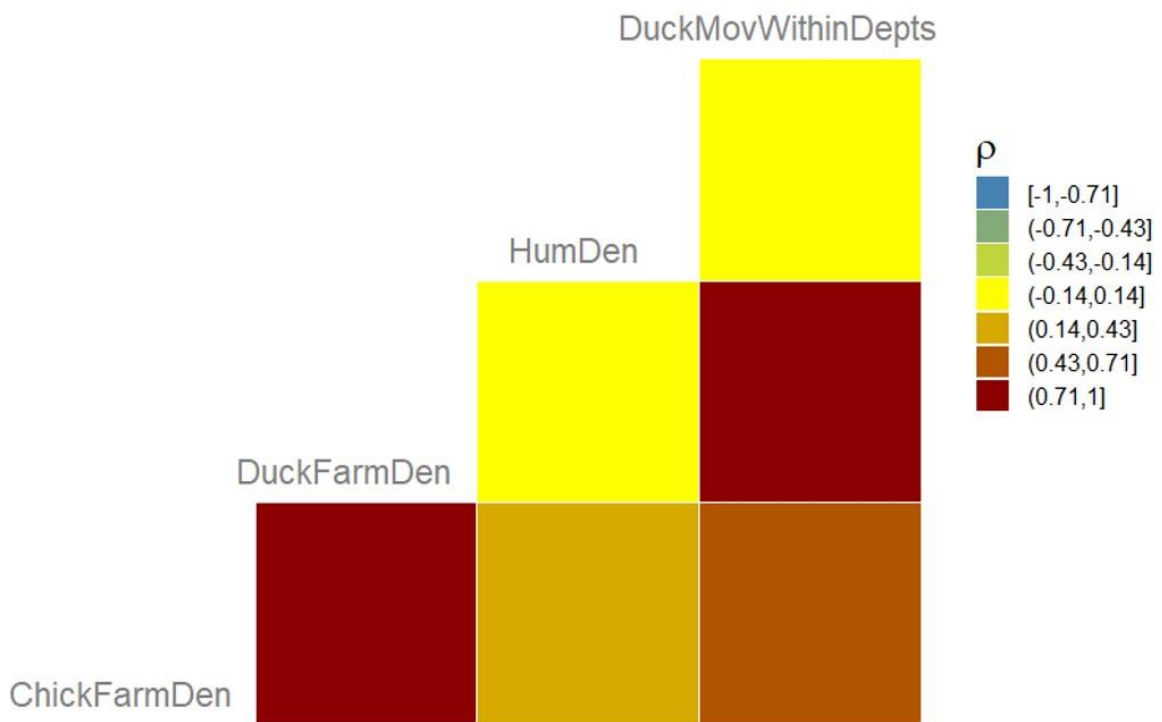

5
