# Supplementary material for: Phylodynamic analysis of the highly pathogenic avian influenza H5N8 epidemic in France, 2016–2017
Source: PubMed Central journal article supplement — Transbound Emerg Dis. 2022 Mar 7;69(5):e1574–83. doi: 10.1111/tbed.14490 (PMC9790735; doi:10.1111/tbed.14490), 2022-03-07
Supplement: TBED-69-e1574-s002.pdf [file TBED-69-e1574-s002.pdf]

| SampleNo | FrenchDeptCode | SamplingDate | Host |
|----------|----------------|--------------|------|
| 161108   | 81             | 28/11/2016   | duck |
| 161113   | 81             | 01/12/2016   | duck |
| 161116   | 47             | 01/12/2016   | duck |
| 161137   | 81             | 02/12/2016   | duck |
| 161141   | 81             | 03/12/2016   | duck |
| 161142   | 81             | 03/12/2016   | duck |
| 161143   | 81             | 03/12/2016   | duck |
| 161147   | 81             | 05/12/2016   | duck |
| 161173   | 47             | 06/12/2016   | duck |
| 161174   | 47             | 06/12/2016   | duck |
| 161182   | 47             | 08/12/2016   | duck |
| 161207   | 12             | 09/12/2016   | duck |
| 161212   | 32             | 08/12/2016   | duck |
| 161224   | 32             | 11/12/2016   | duck |
| 161225   | 32             | 11/12/2016   | duck |
| 161227   | 32             | 10/12/2016   | duck |
| 161228   | 32             | 10/12/2016   | duck |
| 161229   | 32             | 10/12/2016   | duck |
| 161230   | 40             | 12/12/2016   | duck |
| 161231   | 64             | 12/12/2016   | duck |
| 161233   | 32             | 12/12/2016   | duck |
| 161234   | 32             | 12/12/2016   | duck |
| 161239   | 12             | 11/12/2016   | duck |
| 161242   | 32             | 12/12/2016   | duck |
| 161243   | 40             | 13/12/2016   | duck |
| 161256   | 32             | 13/12/2016   | duck |
| 161263   | 32             | 16/12/2016   | duck |
| 161271   | 32             | 15/12/2016   | duck |

|        |    |            |      |
|--------|----|------------|------|
| 161275 | 32 | 16/12/2016 | duck |
| 161277 | 32 | 18/12/2016 | duck |
| 161298 | 32 | 17/12/2016 | duck |
| 161383 | 65 | 16/12/2016 | duck |
| 161443 | 32 | 21/12/2016 | duck |
| 161444 | 40 | 22/12/2016 | duck |
| 161445 | 32 | 23/12/2016 | duck |
| 161449 | 32 | 22/12/2016 | duck |
| 161450 | 40 | 22/12/2016 | duck |
| 161455 | 40 | 23/12/2016 | duck |
| 161456 | 32 | 26/12/2016 | duck |
| 161457 | 32 | 22/12/2016 | duck |
| 161473 | 32 | 22/12/2016 | duck |
| 161475 | 40 | 26/12/2016 | duck |
| 161476 | 40 | 16/12/2016 | duck |
| 161477 | 40 | 25/12/2016 | duck |
| 161478 | 32 | 25/12/2016 | duck |
| 161497 | 32 | 27/12/2016 | duck |
| 161498 | 40 | 28/12/2016 | duck |
| 161500 | 65 | 26/12/2016 | duck |
| 161501 | 32 | 26/12/2016 | duck |
| 161577 | 40 | 28/12/2016 | duck |
| 161587 | 40 | 27/12/2016 | duck |
| 161600 | 32 | 29/12/2016 | duck |
| 161601 | 40 | 30/12/2016 | duck |
| 170013 | 32 | 30/12/2016 | duck |
| 170016 | 32 | 30/12/2016 | duck |
| 170017 | 32 | 30/12/2016 | duck |
| 170018 | 32 | 02/01/2017 | duck |

|        |    |            |                  |
|--------|----|------------|------------------|
| 170030 | 32 | 31/12/2016 | duck             |
| 170031 | 32 | 02/01/2017 | duck             |
| 170032 | 32 | 04/01/2017 | duck             |
| 170033 | 32 | 31/12/2016 | duck             |
| 170034 | 32 | 03/01/2017 | duck             |
| 170036 | 32 | 02/01/2017 | duck             |
| 170038 | 32 | 02/01/2017 | duck             |
| 170063 | 40 | 04/01/2017 | chicken          |
| 170064 | 32 | 04/01/2017 | duck             |
| 170067 | 32 | 04/01/2017 | duck             |
| 170098 | 32 | 02/01/2017 | duck             |
| 170117 | 40 | 08/01/2017 | duck             |
| 170118 | 65 | 06/01/2017 | duck             |
| 170176 | 40 | 07/01/2017 | chicken          |
| 170177 | 40 | 08/01/2017 | duck             |
| 170178 | 40 | 08/01/2017 | duck             |
| 170245 | 40 | 10/01/2017 | duck             |
| 170249 | 32 | 10/01/2017 | duck             |
| 170250 | 40 | 10/01/2017 | duck             |
| 170278 | 32 | 11/01/2017 | turkey           |
| 170280 | 32 | 11/01/2017 | duck             |
| 170284 | 40 | 11/01/2017 | duck             |
| 170308 | 32 | 13/01/2017 | duck             |
| 170309 | 32 | 13/01/2017 | duck             |
| 170324 | 40 | 13/01/2017 | duck and chicken |
| 170325 | 40 | 12/01/2017 | duck             |
| 170330 | 65 | 13/01/2017 | duck             |
| 170331 | 65 | 13/01/2017 | duck             |
| 170338 | 40 | 16/01/2017 | duck             |

|        |    |            |               |
|--------|----|------------|---------------|
| 170339 | 32 | 13/01/2017 | duck          |
| 170340 | 65 | 13/01/2017 | chicken       |
| 170341 | 40 | 13/01/2017 | duck          |
| 170368 | 40 | 16/01/2017 | duck          |
| 170369 | 40 | 14/01/2017 | duck          |
| 170370 | 65 | 14/01/2017 | duck          |
| 170406 | 32 | 19/01/2017 | commonbuzzard |
| 170407 | 40 | 16/01/2017 | chicken       |
| 170408 | 40 | 17/01/2017 | chicken       |
| 170409 | 40 | 17/01/2017 | guineafowl    |
| 170432 | 40 | 18/01/2017 | duck          |
| 170433 | 40 | 16/01/2017 | chicken       |
| 170436 | 40 | 17/01/2017 | chicken       |
| 170437 | 40 | 17/01/2017 | duck          |
| 170473 | 32 | 21/01/2017 | Kestelfalcon  |
| 170518 | 64 | 18/01/2017 | duck          |
| 170612 | 32 | 23/01/2017 | duck          |
| 170683 | 40 | 20/01/2017 | duck          |
| 170685 | 65 | 23/01/2017 | duck          |
| 170686 | 40 | 24/01/2017 | chicken       |
| 170733 | 32 | 25/01/2017 | duck          |
| 170734 | 65 | 25/01/2017 | commonbuzzard |
| 170735 | 32 | 25/01/2017 | duck          |
| 170738 | 65 | 24/01/2017 | duck          |
| 170740 | 32 | 27/01/2017 | commonbuzzard |
| 170772 | 32 | 27/01/2017 | duck          |
| 170773 | 40 | 27/01/2017 | chicken       |
| 170774 | 40 | 24/01/2017 | chicken       |
| 170775 | 64 | 24/01/2017 | duck          |

|        |    |            |                |
|--------|----|------------|----------------|
| 170806 | 32 | 25/01/2017 | duck           |
| 170820 | 40 | 30/01/2017 | duck           |
| 170822 | 64 | 30/01/2017 | duck           |
| 170974 | 65 | 31/01/2017 | duck           |
| 170975 | 65 | 31/01/2017 | duck           |
| 170976 | 65 | 01/02/2017 | goose          |
| 170977 | 32 | 27/01/2017 | backyard birds |
| 171131 | 40 | 02/02/2017 | duck           |
| 171133 | 40 | 03/02/2017 | duck           |
| 171134 | 64 | 03/02/2017 | duck           |
| 171202 | 40 | 03/02/2017 | duck           |
| 171253 | 40 | 05/02/2017 | duck           |
| 171270 | 40 | 07/02/2017 | duck           |
| 171275 | 32 | 07/02/2017 | duck           |
| 171278 | 40 | 06/02/2017 | goose          |
| 171378 | 40 | 07/02/2017 | duck           |
| 171379 | 65 | 06/02/2017 | duck           |
| 171408 | 40 | 07/02/2017 | duck           |
| 171410 | 40 | 08/02/2017 | duck           |
| 171413 | 32 | 08/02/2017 | commonbuzzard  |
| 171455 | 40 | 11/02/2017 | duck           |
| 171457 | 40 | 11/02/2017 | duck           |
| 171461 | 40 | 12/02/2017 | duck           |
| 171462 | 40 | 12/02/2017 | duck           |
| 171463 | 40 | 12/02/2017 | duck           |
| 171466 | 32 | 10/02/2017 | duck           |
| 171467 | 40 | 10/02/2017 | duck           |
| 171468 | 40 | 10/02/2017 | duck           |
| 171469 | 40 | 11/02/2017 | duck           |

|        |    |            |                |
|--------|----|------------|----------------|
| 171471 | 40 | 11/02/2017 | chicken        |
| 171472 | 40 | 11/02/2017 | duck           |
| 171486 | 40 | 11/02/2017 | duck           |
| 171514 | 40 | 11/02/2017 | duck           |
| 171525 | 40 | 13/02/2017 | chicken        |
| 171533 | 40 | 13/02/2017 | duck           |
| 171534 | 40 | 12/02/2017 | chicken        |
| 171535 | 40 | 12/02/2017 | duck           |
| 171536 | 40 | 14/02/2017 | duck           |
| 171537 | 40 | 14/02/2017 | chicken        |
| 171539 | 40 | 14/02/2017 | duck           |
| 171541 | 40 | 14/02/2017 | duck           |
| 171542 | 40 | 13/02/2017 | duck           |
| 171543 | 40 | 14/02/2017 | duck           |
| 171546 | 40 | 14/02/2017 | duck           |
| 171550 | 40 | 14/02/2017 | duck           |
| 171599 | 40 | 15/02/2017 | backyard birds |
| 171603 | 40 | 16/02/2017 | duck           |
| 171606 | 40 | 16/02/2017 | unknown        |
| 171607 | 40 | 15/02/2017 | duck           |
| 171639 | 40 | 15/02/2017 | duck           |
| 171641 | 40 | 14/02/2017 | duck           |
| 171650 | 40 | 15/02/2017 | duck           |
| 171860 | 40 | 21/02/2017 | duck           |
| 171862 | 40 | 22/02/2017 | duck           |
| 171874 | 40 | 20/02/2017 | duck           |
| 171884 | 40 | 22/02/2017 | duck           |
| 171915 | 40 | 21/02/2017 | chicken        |
| 171928 | 40 | 02/03/2017 | duck           |

|        |    |            |         |
|--------|----|------------|---------|
| 171929 | 40 | 24/02/2017 | duck    |
| 171932 | 40 | 24/02/2017 | duck    |
| 172002 | 40 | 25/02/2017 | chicken |
| 172003 | 40 | 25/02/2017 | chicken |
| 172004 | 40 | 25/02/2017 | duck    |
| 172012 | 40 | 23/02/2017 | duck    |
| 172038 | 47 | 27/02/2017 | duck    |
| 172057 | 64 | 27/02/2017 | duck    |
| 172092 | 40 | 28/02/2017 | chicken |
| 172093 | 40 | 28/02/2017 | chicken |
| 172094 | 40 | 01/03/2017 | duck    |
| 172096 | 64 | 01/03/2017 | duck    |
| 172137 | 40 | 02/03/2017 | chicken |
| 172144 | 40 | 27/02/2017 | duck    |
| 172182 | 40 | 01/03/2017 | duck    |
| 172287 | 64 | 07/03/2017 | chicken |
| 172289 | 64 | 04/03/2017 | duck    |
| 172331 | 64 | 13/03/2017 | duck    |
| 172362 | 64 | 18/03/2017 | duck    |
| 172383 | 64 | 21/03/2017 | chicken |
| 172384 | 64 | 22/03/2017 | duck    |
| 172390 | 64 | 21/03/2017 | duck    |
| 172394 | 64 | 21/03/2017 | duck    |
