# Supplementary material for: Phylodynamic analysis of the highly pathogenic avian influenza H5N8 epidemic in France, 2016–2017
Source: PubMed Central journal article supplement — Transbound Emerg Dis. 2022 Mar 7;69(5):e1574–83. doi: 10.1111/tbed.14490 (PMC9790735; doi:10.1111/tbed.14490), 2022-03-07
Supplement: TBED-69-e1574-s003.pdf [file TBED-69-e1574-s003.pdf]

# Highly Pathogenic Avian Influenza A(H5N8) Virus Spread by Short- and Long-Range Transmission, France, 2016–17

**Appendix Table 1.** Accession nos. of highly pathogenic influenza A(H5N8) viruses, France, 2016–2017\*

| Sample no. | Host                    | Collection date | Dept no. | Location              | Gene segment  |               |               |               |               |               |               |               |
|------------|-------------------------|-----------------|----------|-----------------------|---------------|---------------|---------------|---------------|---------------|---------------|---------------|---------------|
|            |                         |                 |          |                       | PB2           | PB1           | PA            | HA            | NP            | NA            | M             | NS            |
| 161104     | <i>Mareca strepera</i>  | 2016 Nov 26     | 62       | Marck                 | EPI86<br>9684 | EPI86<br>9685 | EPI86<br>9686 | EPI86<br>9687 | EPI86<br>9688 | EPI86<br>9689 | EPI86<br>9690 | EPI86<br>9691 |
| 161108     | domestic duck†          | 2016 Nov 29     | 81       | Almayrac              | EPI86<br>9806 | EPI86<br>9807 | EPI86<br>9808 | EPI86<br>9809 | EPI86<br>9810 | EPI86<br>9811 | EPI86<br>9812 | EPI86<br>9813 |
| 161113     | domestic duck           | 2016 Dec 1      | 81       | Almayrac              | MN87<br>4281  | MN87<br>4491  | MN87<br>4701  | MN87<br>4911  | MN87<br>5121  | MN87<br>5331  | MN87<br>5541  | MN87<br>5751  |
| 161116     | domestic duck           | 2016 Dec 1      | 47       | Monbahus              | MN87<br>4282  | MN87<br>4492  | MN87<br>4702  | MN87<br>4912  | MN87<br>5122  | MN87<br>5332  | MN87<br>5542  | MN87<br>5752  |
| 161137     | domestic duck           | 2016 Dec 2      | 81       | Lacappelle-Ségalar    | MN87<br>4283  | MN87<br>4493  | MN87<br>4703  | MN87<br>4913  | MN87<br>5123  | MN87<br>5333  | MN87<br>5543  | MN87<br>5753  |
| 161141     | domestic duck           | 2016 Dec 3      | 81       | Mouzieys-Panens       | MN87<br>4284  | MN87<br>4494  | MN87<br>4704  | MN87<br>4914  | MN87<br>5124  | MN87<br>5334  | MN87<br>5544  | MN87<br>5754  |
| 161142     | domestic duck           | 2016 Dec 3      | 81       | Monestiés             | MN87<br>4285  | MN87<br>4495  | MN87<br>4705  | MN87<br>4915  | MN87<br>5125  | MN87<br>5335  | MN87<br>5545  | MN87<br>5755  |
| 161143     | domestic duck           | 2016 Dec 3      | 81       | Monestiés             | MN87<br>4286  | MN87<br>4496  | MN87<br>4706  | MN87<br>4916  | MN87<br>5126  | MN87<br>5336  | MN87<br>5546  | MN87<br>5756  |
| 161147     | domestic duck           | 2016 Dec 5      | 81       | Monestiés             | MN87<br>4287  | MN87<br>4497  | MN87<br>4707  | MN87<br>4917  | MN87<br>5127  | MN87<br>5337  | MN87<br>5547  | MN87<br>5757  |
| 161173     | domestic duck           | 2016 Dec 6      | 47       | Monbahus              | MN87<br>4288  | MN87<br>4498  | MN87<br>4708  | MN87<br>4918  | MN87<br>5128  | MN87<br>5338  | MN87<br>5548  | MN87<br>5758  |
| 161174     | domestic duck           | 2016 Dec 6      | 47       | Monbahus              | MN87<br>4289  | MN87<br>4499  | MN87<br>4709  | MN87<br>4919  | MN87<br>5129  | MN87<br>5339  | MN87<br>5549  | MN87<br>5759  |
| 161176     | <i>Larus argentatus</i> | 2017 Nov 23     | 74       | Cluses                | MN87<br>4481  | MN87<br>4691  | MN87<br>4901  | MN87<br>5111  | MN87<br>5321  | MN87<br>5531  | MN87<br>5741  | MN87<br>5951  |
| 161182     | domestic duck           | 2016 Dec 8      | 47       | Monbahus              | MN87<br>4290  | MN87<br>4500  | MN87<br>4710  | MN87<br>4920  | MN87<br>5130  | MN87<br>5340  | MN87<br>5550  | MN87<br>5760  |
| 161207     | domestic duck           | 2016 Dec 9      | 12       | Tayrac                | MN87<br>4291  | MN87<br>4501  | MN87<br>4711  | MN87<br>4921  | MN87<br>5131  | MN87<br>5341  | MN87<br>5551  | MN87<br>5761  |
| 161212     | domestic duck           | 2016 Dec 8      | 32       | Segos                 | MN87<br>4292  | MN87<br>4502  | MN87<br>4712  | MN87<br>4922  | MN87<br>5132  | MN87<br>5342  | MN87<br>5552  | MN87<br>5762  |
| 161224     | domestic duck           | 2016 Dec 11     | 32       | Avéron-Bergelle       | MN87<br>4293  | MN87<br>4503  | MN87<br>4713  | MN87<br>4923  | MN87<br>5133  | MN87<br>5343  | MN87<br>5553  | MN87<br>5763  |
| 161225     | domestic duck           | 2016 Dec 11     | 32       | Eauze                 | MN87<br>4294  | MN87<br>4504  | MN87<br>4714  | MN87<br>4924  | MN87<br>5134  | MN87<br>5344  | MN87<br>5554  | MN87<br>5764  |
| 161227     | domestic duck           | 2016 Dec 10     | 32       | Caupenne-d'Armagnac   | MN87<br>4295  | MN87<br>4505  | MN87<br>4715  | MN87<br>4925  | MN87<br>5135  | MN87<br>5345  | MN87<br>5555  | MN87<br>5765  |
| 161228     | domestic duck           | 2016 Dec 10     | 32       | Caupenne-d'Armagnac   | MN87<br>4296  | MN87<br>4506  | MN87<br>4716  | MN87<br>4926  | MN87<br>5136  | MN87<br>5346  | MN87<br>5556  | MN87<br>5766  |
| 161229     | domestic duck           | 2016 Dec 10     | 32       | Caupenne-d'Armagnac   | MN87<br>4297  | MN87<br>4507  | MN87<br>4717  | MN87<br>4927  | MN87<br>5137  | MN87<br>5347  | MN87<br>5557  | MN87<br>5767  |
| 161230     | domestic duck           | 2016 Dec 12     | 40       | Eugénie-les-Bains     | MN87<br>4298  | MN87<br>4508  | MN87<br>4718  | MN87<br>4928  | MN87<br>5138  | MN87<br>5348  | MN87<br>5558  | MN87<br>5768  |
| 161231     | domestic duck           | 2016 Dec 12     | 64       | Espoeey               | MN87<br>4299  | MN87<br>4509  | MN87<br>4719  | MN87<br>4929  | MN87<br>5139  | MN87<br>5349  | MN87<br>5559  | MN87<br>5769  |
| 161233     | domestic duck           | 2016 Dec 12     | 32       | Mansempuy             | MN87<br>4300  | MN87<br>4510  | MN87<br>4720  | MN87<br>4930  | MN87<br>5140  | MN87<br>5350  | MN87<br>5560  | MN87<br>5770  |
| 161234     | domestic duck           | 2016 Dec 12     | 32       | Mauléon-d'Armagnac    | MN87<br>4301  | MN87<br>4511  | MN87<br>4721  | MN87<br>4931  | MN87<br>5141  | MN87<br>5351  | MN87<br>5561  | MN87<br>5771  |
| 161239     | domestic duck           | 2016 Dec 11     | 12       | Tayrac                | MN87<br>4302  | MN87<br>4512  | MN87<br>4722  | MN87<br>4932  | MN87<br>5142  | MN87<br>5352  | MN87<br>5562  | MN87<br>5772  |
| 161240     | domestic duck           | 2016 Dec 12     | 81       | Saint-Martin-Laguépie | MN87<br>4303  | MN87<br>4513  | MN87<br>4723  | MN87<br>4933  | MN87<br>5143  | MN87<br>5353  | MN87<br>5563  | MN87<br>5773  |

| Sample no. | Host                   | Collection date | Dept no. | Location             | Gene segment |              |              |              |              |              |              |              |
|------------|------------------------|-----------------|----------|----------------------|--------------|--------------|--------------|--------------|--------------|--------------|--------------|--------------|
|            |                        |                 |          |                      | PB2          | PB1          | PA           | HA           | NP           | NA           | M            | NS           |
| 161242     | domestic duck          | 2016 Dec 13     | 32       | Saint-Medard         | MN87<br>4304 | MN87<br>4514 | MN87<br>4724 | MN87<br>4934 | MN87<br>5144 | MN87<br>5354 | MN87<br>5564 | MN87<br>5774 |
| 161243     | domestic duck          | 2016 Dec 13     | 40       | Lussagnet-Lusson     | MN87<br>4305 | MN87<br>4515 | MN87<br>4725 | MN87<br>4935 | MN87<br>5145 | MN87<br>5355 | MN87<br>5565 | MN87<br>5775 |
| 161256     | domestic duck          | 2016 Dec 16     | 32       | Monlezun D'Armagnac  | MN87<br>4306 | MN87<br>4516 | MN87<br>4726 | MN87<br>4936 | MN87<br>5146 | MN87<br>5356 | MN87<br>5566 | MN87<br>5776 |
| 161263     | domestic duck          | 2016 Dec 15     | 32       | Bernède              | MN87<br>4307 | MN87<br>4517 | MN87<br>4727 | MN87<br>4937 | MN87<br>5147 | MN87<br>5357 | MN87<br>5567 | MN87<br>5777 |
| 161271     | domestic duck          | 2016 Dec 16     | 32       | Saint-Medard         | MN87<br>4308 | MN87<br>4518 | MN87<br>4728 | MN87<br>4938 | MN87<br>5148 | MN87<br>5358 | MN87<br>5568 | MN87<br>5778 |
| 161275     | domestic duck          | 2016 Dec 18     | 32       | Bars                 | MN87<br>4309 | MN87<br>4519 | MN87<br>4729 | MN87<br>4939 | MN87<br>5149 | MN87<br>5359 | MN87<br>5569 | MN87<br>5779 |
| 161277     | domestic duck          | 2016 Dec 17     | 32       | Laujuzan             | MN87<br>4310 | MN87<br>4520 | MN87<br>4730 | MN87<br>4940 | MN87<br>5150 | MN87<br>5360 | MN87<br>5570 | MN87<br>5780 |
| 161298     | domestic duck          | 2016 Dec 16     | 32       | nonprécisé           | MN87<br>4311 | MN87<br>4521 | MN87<br>4731 | MN87<br>4941 | MN87<br>5151 | MN87<br>5361 | MN87<br>5571 | MN87<br>5781 |
| 161323     | <i>Mareca penelope</i> | 2016 Dec 18     | 50       | Sainte-Marie-du-Mont | MN87<br>4479 | MN87<br>4689 | MN87<br>4899 | MN87<br>5109 | MN87<br>5319 | MN87<br>5529 | MN87<br>5739 | MN87<br>5949 |
| 161383     | domestic duck          | 2016 Dec 21     | 65       | Fontrailles          | MN87<br>4312 | MN87<br>4522 | MN87<br>4732 | MN87<br>4942 | MN87<br>5152 | MN87<br>5362 | MN87<br>5572 | MN87<br>5782 |
| 161443     | domestic duck          | 2016 Dec 22     | 32       | Barcugnan            | MN87<br>4313 | MN87<br>4523 | MN87<br>4733 | MN87<br>4943 | MN87<br>5153 | MN87<br>5363 | MN87<br>5573 | MN87<br>5783 |
| 161444     | domestic duck          | 2016 Dec 23     | 40       | Perquie              | MN87<br>4314 | MN87<br>4524 | MN87<br>4734 | MN87<br>4944 | MN87<br>5154 | MN87<br>5364 | MN87<br>5574 | MN87<br>5784 |
| 161445     | domestic duck          | 2016 Dec 22     | 32       | Monguilhen           | MN87<br>4315 | MN87<br>4525 | MN87<br>4735 | MN87<br>4945 | MN87<br>5155 | MN87<br>5365 | MN87<br>5575 | MN87<br>5785 |
| 161449     | domestic duck          | 2016 Dec 22     | 32       | Barcelonne-du-Gers   | MN87<br>4316 | MN87<br>4526 | MN87<br>4736 | MN87<br>4946 | MN87<br>5156 | MN87<br>5366 | MN87<br>5576 | MN87<br>5786 |
| 161450     | domestic duck          | 2016 Dec 22     | 40       | Saint-Agnet          | MN87<br>4317 | MN87<br>4527 | MN87<br>4737 | MN87<br>4947 | MN87<br>5157 | MN87<br>5367 | MN87<br>5577 | MN87<br>5787 |
| 161455     | domestic duck          | 2016 Dec 23     | 40       | Duhort-Bachen        | MN87<br>4318 | MN87<br>4528 | MN87<br>4738 | MN87<br>4948 | MN87<br>5158 | MN87<br>5368 | MN87<br>5578 | MN87<br>5788 |
| 161456     | domestic duck          | 2016 Dec 26     | 32       | Monguilhem           | MN87<br>4319 | MN87<br>4529 | MN87<br>4739 | MN87<br>4949 | MN87<br>5159 | MN87<br>5369 | MN87<br>5579 | MN87<br>5789 |
| 161457     | domestic duck          | 2016 Dec 22     | 32       | Duffort              | MN87<br>4320 | MN87<br>4530 | MN87<br>4740 | MN87<br>4950 | MN87<br>5160 | MN87<br>5370 | MN87<br>5580 | MN87<br>5790 |
| 161473     | domestic duck          | 2016 Dec 24     | 32       | Eauze                | MN87<br>4321 | MN87<br>4531 | MN87<br>4741 | MN87<br>4951 | MN87<br>5161 | MN87<br>5371 | MN87<br>5581 | MN87<br>5791 |
| 161475     | domestic duck          | 2016 Dec 26     | 40       | Duhort-Bachen        | MN87<br>4322 | MN87<br>4532 | MN87<br>4742 | MN87<br>4952 | MN87<br>5162 | MN87<br>5372 | MN87<br>5582 | MN87<br>5792 |
| 161476     | domestic duck          | 2016 Dec 16     | 40       | Duhort-Bachen        | MN87<br>4323 | MN87<br>4533 | MN87<br>4743 | MN87<br>4953 | MN87<br>5163 | MN87<br>5373 | MN87<br>5583 | MN87<br>5793 |
| 161477     | domestic duck          | 2016 Dec 25     | 40       | Aire-sur-l'Adour     | MN87<br>4324 | MN87<br>4534 | MN87<br>4744 | MN87<br>4954 | MN87<br>5164 | MN87<br>5374 | MN87<br>5584 | MN87<br>5794 |
| 161478     | domestic duck          | 2016 Dec 25     | 32       | Tillac               | MN87<br>4325 | MN87<br>4535 | MN87<br>4745 | MN87<br>4955 | MN87<br>5165 | MN87<br>5375 | MN87<br>5585 | MN87<br>5795 |
| 161497     | domestic duck          | 2016 Dec 27     | 32       | Segos                | MN87<br>4326 | MN87<br>4536 | MN87<br>4746 | MN87<br>4956 | MN87<br>5166 | MN87<br>5376 | MN87<br>5586 | MN87<br>5796 |
| 161498     | domestic duck          | 2016 Dec 28     | 40       | Duhort-Bachen        | MN87<br>4327 | MN87<br>4537 | MN87<br>4747 | MN87<br>4957 | MN87<br>5167 | MN87<br>5377 | MN87<br>5587 | MN87<br>5797 |
| 161500     | domestic duck          | 2016 Dec 26     | 65       | Guizerix             | MN87<br>4328 | MN87<br>4538 | MN87<br>4748 | MN87<br>4958 | MN87<br>5168 | MN87<br>5378 | MN87<br>5588 | MN87<br>5798 |
| 161501     | domestic duck          | 2016 Dec 26     | 32       | Eauze                | MN87<br>4329 | MN87<br>4539 | MN87<br>4749 | MN87<br>4959 | MN87<br>5169 | MN87<br>5379 | MN87<br>5589 | MN87<br>5799 |
| 161577     | domestic duck          | 2016 Dec 27     | 40       | Aire-sur-l'Adour     | MN87<br>4330 | MN87<br>4540 | MN87<br>4750 | MN87<br>4960 | MN87<br>5170 | MN87<br>5380 | MN87<br>5590 | MN87<br>5800 |
| 161585     | <i>Gallus Gallus</i>   | 2016 Dec 28     | 79       | Fors                 | MN87<br>4478 | MN87<br>4688 | MN87<br>4898 | MN87<br>5108 | MN87<br>5318 | MN87<br>5528 | MN87<br>5738 | MN87<br>5948 |
| 161587     | domestic duck          | 2016 Dec 28     | 40       | Saint-Agnet          | MN87<br>4331 | MN87<br>4541 | MN87<br>4751 | MN87<br>4961 | MN87<br>5171 | MN87<br>5381 | MN87<br>5591 | MN87<br>5801 |
| 161600     | domestic duck          | 2016 Dec 29     | 32       | Sauviac              | MN87<br>4332 | MN87<br>4542 | MN87<br>4752 | MN87<br>4962 | MN87<br>5172 | MN87<br>5382 | MN87<br>5592 | MN87<br>5802 |
| 161601     | domestic duck          | 2016 Dec 30     | 40       | Renung               | MN87<br>4333 | MN87<br>4543 | MN87<br>4753 | MN87<br>4963 | MN87<br>5173 | MN87<br>5383 | MN87<br>5593 | MN87<br>5803 |
| 170013     | domestic duck          | 2016 Dec 30     | 32       | Viella               | MN87<br>4334 | MN87<br>4544 | MN87<br>4754 | MN87<br>4964 | MN87<br>5174 | MN87<br>5384 | MN87<br>5594 | MN87<br>5804 |
| 170016     | domestic duck          | 2016 Dec 30     | 32       | Saint-Martin         | MN87<br>4335 | MN87<br>4545 | MN87<br>4755 | MN87<br>4965 | MN87<br>5175 | MN87<br>5385 | MN87<br>5595 | MN87<br>5805 |

| Sample no. | Host                       | Collection date | Dept no. | Location                   | Gene segment |              |              |              |              |              |              |              |
|------------|----------------------------|-----------------|----------|----------------------------|--------------|--------------|--------------|--------------|--------------|--------------|--------------|--------------|
|            |                            |                 |          |                            | PB2          | PB1          | PA           | HA           | NP           | NA           | M            | NS           |
| 170017     | domestic duck              | 2016 Dec 30     | 32       | Saint-Michel               | MN87<br>4336 | MN87<br>4546 | MN87<br>4756 | MN87<br>4966 | MN87<br>5176 | MN87<br>5386 | MN87<br>5596 | MN87<br>5806 |
| 170018     | domestic duck              | 2017 Jan 2      | 32       | L'Isle-de-Noé              | MN87<br>4337 | MN87<br>4547 | MN87<br>4757 | MN87<br>4967 | MN87<br>5177 | MN87<br>5387 | MN87<br>5597 | MN87<br>5807 |
| 170030     | domestic duck              | 2016 Dec 31     | 32       | Belloc-Saint-Clamens       | MN87<br>4338 | MN87<br>4548 | MN87<br>4758 | MN87<br>4968 | MN87<br>5178 | MN87<br>5388 | MN87<br>5598 | MN87<br>5808 |
| 170031     | domestic duck              | 2017 Jan 2      | 32       | Sainte-Christie-d'Armagnac | MN87<br>4339 | MN87<br>4549 | MN87<br>4759 | MN87<br>4969 | MN87<br>5179 | MN87<br>5389 | MN87<br>5599 | MN87<br>5809 |
| 170032     | domestic duck              | 2017 Jan 4      | 32       | Sauviac                    | MN87<br>4340 | MN87<br>4550 | MN87<br>4760 | MN87<br>4970 | MN87<br>5180 | MN87<br>5390 | MN87<br>5600 | MN87<br>5810 |
| 170033     | domestic duck              | 2016 Dec 31     | 32       | Magnan                     | MN87<br>4341 | MN87<br>4551 | MN87<br>4761 | MN87<br>4971 | MN87<br>5181 | MN87<br>5391 | MN87<br>5601 | MN87<br>5811 |
| 170034     | domestic duck              | 2017 Jan 3      | 32       | Le Houga                   | MN87<br>4342 | MN87<br>4552 | MN87<br>4762 | MN87<br>4972 | MN87<br>5182 | MN87<br>5392 | MN87<br>5602 | MN87<br>5812 |
| 170036     | domestic duck              | 2017 Jan 02     | 32       | Montesquiou                | MN87<br>4343 | MN87<br>4553 | MN87<br>4763 | MN87<br>4973 | MN87<br>5183 | MN87<br>5393 | MN87<br>5603 | MN87<br>5813 |
| 170038     | domestic duck              | 2017 Jan 2      | 32       | Sauviac                    | MN87<br>4344 | MN87<br>4554 | MN87<br>4764 | MN87<br>4974 | MN87<br>5184 | MN87<br>5394 | MN87<br>5604 | MN87<br>5814 |
| 170063     | <i>Gallus Gallus</i>       | 2017 Jan 4      | 40       | Saint-Agnet                | MN87<br>4345 | MN87<br>4555 | MN87<br>4765 | MN87<br>4975 | MN87<br>5185 | MN87<br>5395 | MN87<br>5605 | MN87<br>5815 |
| 170064     | domestic duck              | 2017 Jan 4      | 32       | Nogaro                     | MN87<br>4346 | MN87<br>4556 | MN87<br>4766 | MN87<br>4976 | MN87<br>5186 | MN87<br>5396 | MN87<br>5606 | MN87<br>5816 |
| 170067     | domestic duck              | 2017 Jan 4      | 32       | Le Houga                   | MN87<br>4347 | MN87<br>4557 | MN87<br>4767 | MN87<br>4977 | MN87<br>5187 | MN87<br>5397 | MN87<br>5607 | MN87<br>5817 |
| 170098     | domestic duck              | 2017 Jan 2      | 32       | Saint-Medard               | MN87<br>4348 | MN87<br>4558 | MN87<br>4768 | MN87<br>4978 | MN87<br>5188 | MN87<br>5398 | MN87<br>5608 | MN87<br>5818 |
| 170117     | domestic duck              | 2017 Jan 8      | 40       | Miramont-Sensacq           | MN87<br>4349 | MN87<br>4559 | MN87<br>4769 | MN87<br>4979 | MN87<br>5189 | MN87<br>5399 | MN87<br>5609 | MN87<br>5819 |
| 170118     | domestic duck              | 2017 Jan 6      | 65       | Coussan                    | MN87<br>4350 | MN87<br>4560 | MN87<br>4770 | MN87<br>4980 | MN87<br>5190 | MN87<br>5400 | MN87<br>5610 | MN87<br>5820 |
| 170166     | swan                       | 2017 Jan 10     | 1        | Bouligneux                 | MN87<br>4486 | MN87<br>4696 | MN87<br>4906 | MN87<br>5116 | MN87<br>5326 | MN87<br>5536 | MN87<br>5746 | MN87<br>5956 |
| 170176     | <i>Gallus Gallus</i>       | 2017 Jan 7      | 40       | Saint-Agnet                | MN87<br>4351 | MN87<br>4561 | MN87<br>4771 | MN87<br>4981 | MN87<br>5191 | MN87<br>5401 | MN87<br>5611 | MN87<br>5821 |
| 170177     | domestic duck              | 2017 Jan 8      | 40       | Mant                       | MN87<br>4352 | MN87<br>4562 | MN87<br>4772 | MN87<br>4982 | MN87<br>5192 | MN87<br>5402 | MN87<br>5612 | MN87<br>5822 |
| 170178     | domestic duck              | 2017 Jan 8      | 40       | Arboucave                  | MN87<br>4353 | MN87<br>4563 | MN87<br>4773 | MN87<br>4983 | MN87<br>5193 | MN87<br>5403 | MN87<br>5613 | MN87<br>5823 |
| 170180     | duck                       | 2017 Jan 12     | 47       | Nérac                      | MN87<br>4354 | MN87<br>4564 | MN87<br>4774 | MN87<br>4984 | MN87<br>5194 | MN87<br>5404 | MN87<br>5614 | MN87<br>5824 |
| 170245     | domestic duck              | 2017 Jan 10     | 40       | Sarraziat                  | MN87<br>4355 | MN87<br>4565 | MN87<br>4775 | MN87<br>4985 | MN87<br>5195 | MN87<br>5405 | MN87<br>5615 | MN87<br>5825 |
| 170249     | domestic duck              | 2017 Jan 10     | 32       | Aux-Aussat                 | MN87<br>4356 | MN87<br>4566 | MN87<br>4776 | MN87<br>4986 | MN87<br>5196 | MN87<br>5406 | MN87<br>5616 | MN87<br>5826 |
| 170250     | domestic duck              | 2017 Jan 10     | 40       | Miramont-Sensacq           | MN87<br>4357 | MN87<br>4567 | MN87<br>4777 | MN87<br>4987 | MN87<br>5197 | MN87<br>5407 | MN87<br>5617 | MN87<br>5827 |
| 170278     | <i>Meleagris gallopavo</i> | 2017 Jan 11     | 32       | Monclar-sur-Losse          | MN87<br>4358 | MN87<br>4568 | MN87<br>4778 | MN87<br>4988 | MN87<br>5198 | MN87<br>5408 | MN87<br>5618 | MN87<br>5828 |
| 170280     | domestic duck              | 2017 Jan 11     | 32       | Saint-Michel               | MN87<br>4359 | MN87<br>4569 | MN87<br>4779 | MN87<br>4989 | MN87<br>5199 | MN87<br>5409 | MN87<br>5619 | MN87<br>5829 |
| 170284     | domestic duck              | 2017 Jan 11     | 40       | site de Larrivière         | MN87<br>4360 | MN87<br>4570 | MN87<br>4780 | MN87<br>4990 | MN87<br>5200 | MN87<br>5410 | MN87<br>5620 | MN87<br>5830 |
| 170308     | domestic duck              | 2017 Jan 13     | 32       | Laas                       | MN87<br>4361 | MN87<br>4571 | MN87<br>4781 | MN87<br>4991 | MN87<br>5201 | MN87<br>5411 | MN87<br>5621 | MN87<br>5831 |
| 170309     | domestic duck              | 2017 Jan 13     | 32       | Saint-Arailles             | MN87<br>4362 | MN87<br>4572 | MN87<br>4782 | MN87<br>4992 | MN87<br>5202 | MN87<br>5412 | MN87<br>5622 | MN87<br>5832 |
| 170325     | domestic duck              | 2017 Jan 12     | 40       | Samadet                    | MN87<br>4363 | MN87<br>4573 | MN87<br>4783 | MN87<br>4993 | MN87<br>5203 | MN87<br>5413 | MN87<br>5623 | MN87<br>5833 |
| 170330     | domestic duck              | 2017 Jan 13     | 65       | Antin                      | MN87<br>4364 | MN87<br>4574 | MN87<br>4784 | MN87<br>4994 | MN87<br>5204 | MN87<br>5414 | MN87<br>5624 | MN87<br>5834 |
| 170331     | domestic duck              | 2017 Jan 13     | 65       | Antin                      | MN87<br>4365 | MN87<br>4575 | MN87<br>4785 | MN87<br>4995 | MN87<br>5205 | MN87<br>5415 | MN87<br>5625 | MN87<br>5835 |
| 170338     | domestic duck              | 2017 Jan 16     | 40       | Samadet                    | MN87<br>4366 | MN87<br>4576 | MN87<br>4786 | MN87<br>4996 | MN87<br>5206 | MN87<br>5416 | MN87<br>5626 | MN87<br>5836 |
| 170339     | domestic duck              | 2017 Jan 13     | 32       | Saint-Élix-Theux           | MN87<br>4367 | MN87<br>4577 | MN87<br>4787 | MN87<br>4997 | MN87<br>5207 | MN87<br>5417 | MN87<br>5627 | MN87<br>5837 |
| 170340     | <i>Gallus Gallus</i>       | 2017 Jan 13     | 65       | Coussan                    | MN87<br>4368 | MN87<br>4578 | MN87<br>4788 | MN87<br>4998 | MN87<br>5208 | MN87<br>5418 | MN87<br>5628 | MN87<br>5838 |

| Sample no. | Host                     | Collection date | Dept no. | Location           | Gene segment |              |              |              |              |              |              |              |
|------------|--------------------------|-----------------|----------|--------------------|--------------|--------------|--------------|--------------|--------------|--------------|--------------|--------------|
|            |                          |                 |          |                    | PB2          | PB1          | PA           | HA           | NP           | NA           | M            | NS           |
| 170341     | domestic duck            | 2017 Jan 13     | 40       | Bahus-Soubiran     | MN87<br>4369 | MN87<br>4579 | MN87<br>4789 | MN87<br>4999 | MN87<br>5209 | MN87<br>5419 | MN87<br>5629 | MN87<br>5839 |
| 170349     | domestic duck            | 2017 Jan 13     | 40       | Samadet            | MN87<br>4370 | MN87<br>4580 | MN87<br>4790 | MN87<br>5000 | MN87<br>5210 | MN87<br>5420 | MN87<br>5630 | MN87<br>5840 |
| 170368     | domestic duck            | 2017 Jan 16     | 40       | Eugénie-les-Bains  | MN87<br>4371 | MN87<br>4581 | MN87<br>4791 | MN87<br>5001 | MN87<br>5211 | MN87<br>5421 | MN87<br>5631 | MN87<br>5841 |
| 170369     | domestic duck            | 2017 Jan 14     | 40       | Saint-Sever        | MN87<br>4372 | MN87<br>4582 | MN87<br>4792 | MN87<br>5002 | MN87<br>5212 | MN87<br>5422 | MN87<br>5632 | MN87<br>5842 |
| 170370     | domestic duck            | 2017 Jan 14     | 65       | Lubret-Saint-Luc   | MN87<br>4373 | MN87<br>4583 | MN87<br>4793 | MN87<br>5003 | MN87<br>5213 | MN87<br>5423 | MN87<br>5633 | MN87<br>5843 |
| 170406     | <i>Buteo buteo</i>       | 2017 Jan 19     | 32       | Barcugnan          | MN87<br>4374 | MN87<br>4584 | MN87<br>4794 | MN87<br>5004 | MN87<br>5214 | MN87<br>5424 | MN87<br>5634 | MN87<br>5844 |
| 170407     | <i>Gallus Gallus</i>     | 2017 Jan 16     | 40       | Samadet            | MN87<br>4375 | MN87<br>4585 | MN87<br>4795 | MN87<br>5005 | MN87<br>5215 | MN87<br>5425 | MN87<br>5635 | MN87<br>5845 |
| 170408     | <i>Gallus Gallus</i>     | 2017 Jan 17     | 40       | Aubagne            | MN87<br>4376 | MN87<br>4586 | MN87<br>4796 | MN87<br>5006 | MN87<br>5216 | MN87<br>5426 | MN87<br>5636 | MN87<br>5846 |
| 170409     | <i>Numida meleagris</i>  | 2017 Jan 17     | 40       | Pimbo              | MN87<br>4377 | MN87<br>4587 | MN87<br>4797 | MN87<br>5007 | MN87<br>5217 | MN87<br>5427 | MN87<br>5637 | MN87<br>5847 |
| 170432     | domestic duck            | 2017 Jan 18     | 40       | Pimbo              | MN87<br>4378 | MN87<br>4588 | MN87<br>4798 | MN87<br>5008 | MN87<br>5218 | MN87<br>5428 | MN87<br>5638 | MN87<br>5848 |
| 170433     | <i>Gallus Gallus</i>     | 2017 Jan 16     | 40       | Montgaillard       | MN87<br>4379 | MN87<br>4589 | MN87<br>4799 | MN87<br>5009 | MN87<br>5219 | MN87<br>5429 | MN87<br>5639 | MN87<br>5849 |
| 170436     | <i>Gallus Gallus</i>     | 2017 Jan 17     | 40       | Miramont-Sensacq   | MN87<br>4380 | MN87<br>4590 | MN87<br>4800 | MN87<br>5010 | MN87<br>5220 | MN87<br>5430 | MN87<br>5640 | MN87<br>5850 |
| 170437     | domestic duck            | 2017 Jan 17     | 40       | Bahus-Soubiran     | MN87<br>4381 | MN87<br>4591 | MN87<br>4801 | MN87<br>5011 | MN87<br>5221 | MN87<br>5431 | MN87<br>5641 | MN87<br>5851 |
| 170473     | <i>Falco tinnunculus</i> | 2017 Jan 21     | 32       | Saint-Michel       | MN87<br>4382 | MN87<br>4592 | MN87<br>4802 | MN87<br>5012 | MN87<br>5222 | MN87<br>5432 | MN87<br>5642 | MN87<br>5852 |
| 170496     | swan                     | 2017 Feb 15     | 44       | Vair-sur-Loire     | MN87<br>4483 | MN87<br>4693 | MN87<br>4903 | MN87<br>5113 | MN87<br>5323 | MN87<br>5533 | MN87<br>5743 | MN87<br>5953 |
| 170518     | domestic duck            | 2017 Jan 18     | 64       | Castetpugon        | MN87<br>4383 | MN87<br>4593 | MN87<br>4803 | MN87<br>5013 | MN87<br>5223 | MN87<br>5433 | MN87<br>5643 | MN87<br>5853 |
| 170612     | domestic duck            | 2017 Jan 23     | 32       | Lelin-Lapujolle    | MN87<br>4384 | MN87<br>4594 | MN87<br>4804 | MN87<br>5014 | MN87<br>5224 | MN87<br>5434 | MN87<br>5644 | MN87<br>5854 |
| 170683     | domestic duck            | 2017 Jan 20     | 40       | Benquet            | MN87<br>4385 | MN87<br>4595 | MN87<br>4805 | MN87<br>5015 | MN87<br>5225 | MN87<br>5435 | MN87<br>5645 | MN87<br>5855 |
| 170685     | domestic duck            | 2017 Jan 23     | 65       | Lapeyre            | MN87<br>4386 | MN87<br>4596 | MN87<br>4806 | MN87<br>5016 | MN87<br>5226 | MN87<br>5436 | MN87<br>5646 | MN87<br>5856 |
| 170686     | <i>Gallus Gallus</i>     | 2017 Jan 24     | 40       | Pimbo              | MN87<br>4387 | MN87<br>4597 | MN87<br>4807 | MN87<br>5017 | MN87<br>5227 | MN87<br>5437 | MN87<br>5647 | MN87<br>5857 |
| 170733     | domestic duck            | 2017 Jan 25     | 32       | Troncens           | MN87<br>4388 | MN87<br>4598 | MN87<br>4808 | MN87<br>5018 | MN87<br>5228 | MN87<br>5438 | MN87<br>5648 | MN87<br>5858 |
| 170734     | domestic duck            | 2017 Jan 25     | 65       | Sentous            | MN87<br>4389 | MN87<br>4599 | MN87<br>4809 | MN87<br>5019 | MN87<br>5229 | MN87<br>5439 | MN87<br>5649 | MN87<br>5859 |
| 170735     | <i>Buteo buteo</i>       | 2017 Jan 25     | 32       | Viella             | MN87<br>4390 | MN87<br>4600 | MN87<br>4810 | MN87<br>5020 | MN87<br>5230 | MN87<br>5440 | MN87<br>5650 | MN87<br>5860 |
| 170738     | domestic duck            | 2017 Jan 24     | 65       | Puydarrieux        | MN87<br>4391 | MN87<br>4601 | MN87<br>4811 | MN87<br>5021 | MN87<br>5231 | MN87<br>5441 | MN87<br>5651 | MN87<br>5861 |
| 170740     | <i>Buteo buteo</i>       | 2017 Jan 27     | 32       | Le Houga           | MN87<br>4392 | MN87<br>4602 | MN87<br>4812 | MN87<br>5022 | MN87<br>5232 | MN87<br>5442 | MN87<br>5652 | MN87<br>5862 |
| 170772     | domestic duck            | 2017 Jan 27     | 32       | Vergoignan         | MN87<br>4393 | MN87<br>4603 | MN87<br>4813 | MN87<br>5023 | MN87<br>5233 | MN87<br>5443 | MN87<br>5653 | MN87<br>5863 |
| 170773     | <i>Gallus Gallus</i>     | 2017 Jan 27     | 40       | Mant               | MN87<br>4394 | MN87<br>4604 | MN87<br>4814 | MN87<br>5024 | MN87<br>5234 | MN87<br>5444 | MN87<br>5654 | MN87<br>5864 |
| 170774     | <i>Gallus Gallus</i>     | 2017 Jan 24     | 40       | Latrille           | MN87<br>4395 | MN87<br>4605 | MN87<br>4815 | MN87<br>5025 | MN87<br>5235 | MN87<br>5445 | MN87<br>5655 | MN87<br>5865 |
| 170775     | domestic duck            | 2017 Jan 24     | 64       | Arzacq-Arraziguët  | MN87<br>4396 | MN87<br>4606 | MN87<br>4816 | MN87<br>5026 | MN87<br>5236 | MN87<br>5446 | MN87<br>5656 | MN87<br>5866 |
| 170806     | domestic duck            | 2017 Jan 25     | 32       | Tarsac             | MN87<br>4397 | MN87<br>4607 | MN87<br>4817 | MN87<br>5027 | MN87<br>5237 | MN87<br>5447 | MN87<br>5657 | MN87<br>5867 |
| 170820     | domestic duck            | 2017 Jan 30     | 40       | Préchacq-les-Bains | MN87<br>4398 | MN87<br>4608 | MN87<br>4818 | MN87<br>5028 | MN87<br>5238 | MN87<br>5448 | MN87<br>5658 | MN87<br>5868 |
| 170822     | domestic duck            | 2017 Jan 30     | 64       | Carrère            | MN87<br>4399 | MN87<br>4609 | MN87<br>4819 | MN87<br>5029 | MN87<br>5239 | MN87<br>5449 | MN87<br>5659 | MN87<br>5869 |
| 170974     | domestic duck            | 2017 Jan 31     | 65       | Puydarrieux        | MN87<br>4400 | MN87<br>4610 | MN87<br>4820 | MN87<br>5030 | MN87<br>5240 | MN87<br>5450 | MN87<br>5660 | MN87<br>5870 |
| 170975     | domestic duck            | 2017 Jan 31     | 65       | Puydarrieux        | MN87<br>4401 | MN87<br>4611 | MN87<br>4821 | MN87<br>5031 | MN87<br>5241 | MN87<br>5451 | MN87<br>5661 | MN87<br>5871 |

| Sample no. | Host                 | Collection date | Dept no. | Location             | Gene segment |              |              |              |              |              |              |              |
|------------|----------------------|-----------------|----------|----------------------|--------------|--------------|--------------|--------------|--------------|--------------|--------------|--------------|
|            |                      |                 |          |                      | PB2          | PB1          | PA           | HA           | NP           | NA           | M            | NS           |
| 170976     | domestic goose       | 2017 Feb 1      | 65       | Lalanne-Trie         | MN87<br>4402 | MN87<br>4612 | MN87<br>4822 | MN87<br>5032 | MN87<br>5242 | MN87<br>5452 | MN87<br>5662 | MN87<br>5872 |
| 170977     | unknown              | 2017 Jan 27     | 32       | Labéjan              | MN87<br>4403 | MN87<br>4613 | MN87<br>4823 | MN87<br>5033 | MN87<br>5243 | MN87<br>5453 | MN87<br>5663 | MN87<br>5873 |
| 171131     | domestic duck        | 2017 Feb 2      | 40       | Hinx                 | MN87<br>4404 | MN87<br>4614 | MN87<br>4824 | MN87<br>5034 | MN87<br>5244 | MN87<br>5454 | MN87<br>5664 | MN87<br>5874 |
| 171133     | domestic duck        | 2017 Feb 3      | 40       | Goos                 | MN87<br>4405 | MN87<br>4615 | MN87<br>4825 | MN87<br>5035 | MN87<br>5245 | MN87<br>5455 | MN87<br>5665 | MN87<br>5875 |
| 171134     | domestic duck        | 2017 Feb 3      | 64       | Miossens-Lanusse     | MN87<br>4406 | MN87<br>4616 | MN87<br>4826 | MN87<br>5036 | MN87<br>5246 | MN87<br>5456 | MN87<br>5666 | MN87<br>5876 |
| 171202     | domestic duck        | 2017 Feb 3      | 40       | Toulouze             | MN87<br>4407 | MN87<br>4617 | MN87<br>4827 | MN87<br>5037 | MN87<br>5247 | MN87<br>5457 | MN87<br>5667 | MN87<br>5877 |
| 171253     | domestic duck        | 2017 Feb 5      | 40       | Gamarde-les-Bains    | MN87<br>4408 | MN87<br>4618 | MN87<br>4828 | MN87<br>5038 | MN87<br>5248 | MN87<br>5458 | MN87<br>5668 | MN87<br>5878 |
| 171265     | swan                 | 2017 Feb 20     | 1        | Versailleux          | MN87<br>4480 | MN87<br>4690 | MN87<br>4900 | MN87<br>5110 | MN87<br>5320 | MN87<br>5530 | MN87<br>5740 | MN87<br>5950 |
| 171267     | swan                 | 2017 Feb 21     | 1        | Marlieux             | MN87<br>4490 | MN87<br>4700 | MN87<br>4910 | MN87<br>5120 | MN87<br>5330 | MN87<br>5540 | MN87<br>5750 | MN87<br>5960 |
| 171270     | domestic duck        | 2017 Feb 7      | 40       | Gibret               | MN87<br>4409 | MN87<br>4619 | MN87<br>4829 | MN87<br>5039 | MN87<br>5249 | MN87<br>5459 | MN87<br>5669 | MN87<br>5879 |
| 171275     | domestic duck        | 2017 Feb 7      | 32       | Fustérouau           | MN87<br>4410 | MN87<br>4620 | MN87<br>4830 | MN87<br>5040 | MN87<br>5250 | MN87<br>5460 | MN87<br>5670 | MN87<br>5880 |
| 171278     | domestic goose       | 2017 Feb 6      | 40       | Montaut              | MN87<br>4411 | MN87<br>4621 | MN87<br>4831 | MN87<br>5041 | MN87<br>5251 | MN87<br>5461 | MN87<br>5671 | MN87<br>5881 |
| 171376     | swan                 | 2017 Mar 25     | 88       | Sanche               | MN87<br>4489 | MN87<br>4699 | MN87<br>4909 | MN87<br>5119 | MN87<br>5329 | MN87<br>5539 | MN87<br>5749 | MN87<br>5959 |
| 171377     | swan                 | 2017 Mar 26     | 1        | Versailleux          | MN87<br>4482 | MN87<br>4692 | MN87<br>4902 | MN87<br>5112 | MN87<br>5322 | MN87<br>5532 | MN87<br>5742 | MN87<br>5952 |
| 171378     | domestic duck        | 2017 Feb 7      | 40       | Gibret               | MN87<br>4412 | MN87<br>4622 | MN87<br>4832 | MN87<br>5042 | MN87<br>5252 | MN87<br>5462 | MN87<br>5672 | MN87<br>5882 |
| 171379     | domestic duck        | 2017 Feb 6      | 65       | Sadournin            | MN87<br>4413 | MN87<br>4623 | MN87<br>4833 | MN87<br>5043 | MN87<br>5253 | MN87<br>5463 | MN87<br>5673 | MN87<br>5883 |
| 171408     | domestic duck        | 2017 Feb 7      | 40       | Baigts               | MN87<br>4414 | MN87<br>4624 | MN87<br>4834 | MN87<br>5044 | MN87<br>5254 | MN87<br>5464 | MN87<br>5674 | MN87<br>5884 |
| 171410     | domestic duck        | 2017 Feb 8      | 40       | Cassen               | MN87<br>4415 | MN87<br>4625 | MN87<br>4835 | MN87<br>5045 | MN87<br>5255 | MN87<br>5465 | MN87<br>5675 | MN87<br>5885 |
| 171413     | <i>Buteo buteo</i>   | 2017 Feb 8      | 32       | Belloc-Saint-Clamens | MN87<br>4416 | MN87<br>4626 | MN87<br>4836 | MN87<br>5046 | MN87<br>5256 | MN87<br>5466 | MN87<br>5676 | MN87<br>5886 |
| 171455     | domestic duck        | 2017 Feb 11     | 40       | Cassen               | MN87<br>4417 | MN87<br>4627 | MN87<br>4837 | MN87<br>5047 | MN87<br>5257 | MN87<br>5467 | MN87<br>5677 | MN87<br>5887 |
| 171457     | domestic duck        | 2017 Feb 11     | 40       | Sort-en-Chalosse     | MN87<br>4418 | MN87<br>4628 | MN87<br>4838 | MN87<br>5048 | MN87<br>5258 | MN87<br>5468 | MN87<br>5678 | MN87<br>5888 |
| 171461     | domestic duck        | 2017 Feb 12     | 40       | gamarde              | MN87<br>4419 | MN87<br>4629 | MN87<br>4839 | MN87<br>5049 | MN87<br>5259 | MN87<br>5469 | MN87<br>5679 | MN87<br>5889 |
| 171462     | domestic duck        | 2017 Feb 12     | 40       | Habas                | MN87<br>4420 | MN87<br>4630 | MN87<br>4840 | MN87<br>5050 | MN87<br>5260 | MN87<br>5470 | MN87<br>5680 | MN87<br>5890 |
| 171463     | domestic duck        | 2017 Feb 12     | 40       | Toulouze             | MN87<br>4421 | MN87<br>4631 | MN87<br>4841 | MN87<br>5051 | MN87<br>5261 | MN87<br>5471 | MN87<br>5681 | MN87<br>5891 |
| 171466     | domestic duck        | 2017 Feb 10     | 32       | Aignan               | MN87<br>4422 | MN87<br>4632 | MN87<br>4842 | MN87<br>5052 | MN87<br>5262 | MN87<br>5472 | MN87<br>5682 | MN87<br>5892 |
| 171467     | domestic duck        | 2017 Feb 10     | 40       | Poyartin             | MN87<br>4423 | MN87<br>4633 | MN87<br>4843 | MN87<br>5053 | MN87<br>5263 | MN87<br>5473 | MN87<br>5683 | MN87<br>5893 |
| 171468     | domestic duck        | 2017 Feb 10     | 40       | Poyartin             | MN87<br>4424 | MN87<br>4634 | MN87<br>4844 | MN87<br>5054 | MN87<br>5264 | MN87<br>5474 | MN87<br>5684 | MN87<br>5894 |
| 171469     | domestic duck        | 2017 Feb 11     | 40       | Hinx                 | MN87<br>4425 | MN87<br>4635 | MN87<br>4845 | MN87<br>5055 | MN87<br>5265 | MN87<br>5475 | MN87<br>5685 | MN87<br>5895 |
| 171471     | <i>Gallus Gallus</i> | 2017 Feb 11     | 40       | Narrosse             | MN87<br>4426 | MN87<br>4636 | MN87<br>4846 | MN87<br>5056 | MN87<br>5266 | MN87<br>5476 | MN87<br>5686 | MN87<br>5896 |
| 171472     | domestic duck        | 2017 Feb 11     | 40       | Montaut              | MN87<br>4427 | MN87<br>4637 | MN87<br>4847 | MN87<br>5057 | MN87<br>5267 | MN87<br>5477 | MN87<br>5687 | MN87<br>5897 |
| 171486     | domestic duck        | 2017 Feb 11     | 40       | Souprosse            | MN87<br>4428 | MN87<br>4638 | MN87<br>4848 | MN87<br>5058 | MN87<br>5268 | MN87<br>5478 | MN87<br>5688 | MN87<br>5898 |
| 171514     | domestic duck        | 2017 Feb 11     | 40       | Hinx                 | MN87<br>4429 | MN87<br>4639 | MN87<br>4849 | MN87<br>5059 | MN87<br>5269 | MN87<br>5479 | MN87<br>5689 | MN87<br>5899 |
| 171525     | <i>Gallus Gallus</i> | 2017 Feb 13     | 40       | Audignon             | MN87<br>4430 | MN87<br>4640 | MN87<br>4850 | MN87<br>5060 | MN87<br>5270 | MN87<br>5480 | MN87<br>5690 | MN87<br>5900 |
| 171533     | domestic duck        | 2017 Feb 13     | 40       | Souprosse            | MN87<br>4431 | MN87<br>4641 | MN87<br>4851 | MN87<br>5061 | MN87<br>5271 | MN87<br>5481 | MN87<br>5691 | MN87<br>5901 |

| Sample no. | Host           | Collection date | Dept no. | Location                    | Gene segment |      |      |      |      |      |      |      |
|------------|----------------|-----------------|----------|-----------------------------|--------------|------|------|------|------|------|------|------|
|            |                |                 |          |                             | PB2          | PB1  | PA   | HA   | NP   | NA   | M    | NS   |
| 171534     | <i>Gallus</i>  | 2017 Feb        | 40       | Magescq                     | MN87         | MN87 | MN87 | MN87 | MN87 | MN87 | MN87 | MN87 |
|            | <i>Gallus</i>  | 12              |          |                             | 4432         | 4642 | 4852 | 5062 | 5272 | 5482 | 5692 | 5902 |
| 171535     | domestic duck  | 2017 Feb        | 40       | Candresse                   | MN87         | MN87 | MN87 | MN87 | MN87 | MN87 | MN87 | MN87 |
|            |                | 12              |          |                             | 4433         | 4643 | 4853 | 5063 | 5273 | 5483 | 5693 | 5903 |
| 171536     | domestic duck  | 2017 Feb        | 40       | Sort-en-Chalosse            | MN87         | MN87 | MN87 | MN87 | MN87 | MN87 | MN87 | MN87 |
|            |                | 14              |          |                             | 4434         | 4644 | 4854 | 5064 | 5274 | 5484 | 5694 | 5904 |
| 171537     | <i>Gallus</i>  | 2017 Feb        | 40       | Laglorieuse                 | MN87         | MN87 | MN87 | MN87 | MN87 | MN87 | MN87 | MN87 |
|            | <i>Gallus</i>  | 14              |          |                             | 4435         | 4645 | 4855 | 5065 | 5275 | 5485 | 5695 | 5905 |
| 171539     | domestic duck  | 2017 Feb        | 40       | Caupenne                    | MN87         | MN87 | MN87 | MN87 | MN87 | MN87 | MN87 | MN87 |
|            |                | 14              |          |                             | 4436         | 4646 | 4856 | 5066 | 5276 | 5486 | 5696 | 5906 |
| 171541     | domestic duck  | 2017 Feb        | 40       | Caupenne                    | MN87         | MN87 | MN87 | MN87 | MN87 | MN87 | MN87 | MN87 |
|            |                | 14              |          |                             | 4437         | 4647 | 4857 | 5067 | 5277 | 5487 | 5697 | 5907 |
| 171542     | domestic duck  | 2017 Feb        | 40       | Tilh                        | MN87         | MN87 | MN87 | MN87 | MN87 | MN87 | MN87 | MN87 |
|            |                | 13              |          |                             | 4438         | 4648 | 4858 | 5068 | 5278 | 5488 | 5698 | 5908 |
| 171543     | domestic duck  | 2017 Feb        | 40       | Bastennes                   | MN87         | MN87 | MN87 | MN87 | MN87 | MN87 | MN87 | MN87 |
|            |                | 14              |          |                             | 4439         | 4649 | 4859 | 5069 | 5279 | 5489 | 5699 | 5909 |
| 171546     | domestic duck  | 2017 Feb        | 40       | Habas                       | MN87         | MN87 | MN87 | MN87 | MN87 | MN87 | MN87 | MN87 |
|            |                | 14              |          |                             | 4440         | 4650 | 4860 | 5070 | 5280 | 5490 | 5700 | 5910 |
| 171550     | domestic duck  | 2017 Feb        | 40       | Souprosse                   | MN87         | MN87 | MN87 | MN87 | MN87 | MN87 | MN87 | MN87 |
|            |                | 14              |          |                             | 4441         | 4651 | 4861 | 5071 | 5281 | 5491 | 5701 | 5911 |
| 171585     | swan           | 2017 Apr        | 1        | Marlieux                    | MN87         | MN87 | MN87 | MN87 | MN87 | MN87 | MN87 | MN87 |
|            |                | 27              |          |                             | 4488         | 4698 | 4908 | 5118 | 5328 | 5538 | 5748 | 5958 |
| 171599     | unknown        | 2017 Feb        | 40       | Montaut                     | MN87         | MN87 | MN87 | MN87 | MN87 | MN87 | MN87 | MN87 |
|            |                | 15              |          |                             | 4442         | 4652 | 4862 | 5072 | 5282 | 5492 | 5702 | 5912 |
| 171603     | domestic duck  | 2017 Feb        | 40       | Saunac-et-Cambran           | MN87         | MN87 | MN87 | MN87 | MN87 | MN87 | MN87 | MN87 |
|            |                | 16              |          |                             | 4443         | 4653 | 4863 | 5073 | 5283 | 5493 | 5703 | 5913 |
| 171606     | unknown        | 2017 Feb        | 40       | Toulouzette                 | MN87         | MN87 | MN87 | MN87 | MN87 | MN87 | MN87 | MN87 |
|            |                | 16              |          |                             | 4444         | 4654 | 4864 | 5074 | 5284 | 5494 | 5704 | 5914 |
| 171607     | domestic duck  | 2017 Feb        | 40       | Baigts                      | MN87         | MN87 | MN87 | MN87 | MN87 | MN87 | MN87 | MN87 |
|            |                | 15              |          |                             | 4445         | 4655 | 4865 | 5075 | 5285 | 5495 | 5705 | 5915 |
| 171639     | domestic duck  | 2017 Feb        | 40       | Nousse                      | MN87         | MN87 | MN87 | MN87 | MN87 | MN87 | MN87 | MN87 |
|            |                | 15              |          |                             | 4446         | 4656 | 4866 | 5076 | 5286 | 5496 | 5706 | 5916 |
| 171641     | domestic duck  | 2017 Feb        | 40       | Samadet                     | MN87         | MN87 | MN87 | MN87 | MN87 | MN87 | MN87 | MN87 |
|            |                | 14              |          |                             | 4447         | 4657 | 4867 | 5077 | 5287 | 5497 | 5707 | 5917 |
| 171650     | domestic duck  | 2017 Feb        | 40       | Maylis                      | MN87         | MN87 | MN87 | MN87 | MN87 | MN87 | MN87 | MN87 |
|            |                | 15              |          |                             | 4448         | 4658 | 4868 | 5078 | 5288 | 5498 | 5708 | 5918 |
| 171779     | domestic duck  | 2017 Feb        | 47       | Cancon                      | MN87         | MN87 | MN87 | MN87 | MN87 | MN87 | MN87 | MN87 |
|            |                | 19              |          |                             | 4484         | 4694 | 4904 | 5114 | 5324 | 5534 | 5744 | 5954 |
| 171860     | domestic duck  | 2017 Feb        | 40       | Saunac-et-Cambran           | MN87         | MN87 | MN87 | MN87 | MN87 | MN87 | MN87 | MN87 |
|            |                | 21              |          |                             | 4449         | 4659 | 4869 | 5079 | 5289 | 5499 | 5709 | 5919 |
| 171874     | domestic duck  | 2017 Feb        | 40       | Castelsarrasin              | MN87         | MN87 | MN87 | MN87 | MN87 | MN87 | MN87 | MN87 |
|            |                | 22              |          |                             | 4450         | 4660 | 4870 | 5080 | 5290 | 5500 | 5710 | 5920 |
| 171884     | domestic duck  | 2017 Feb        | 40       | Lamothe                     | MN87         | MN87 | MN87 | MN87 | MN87 | MN87 | MN87 | MN87 |
|            |                | 20              |          |                             | 4451         | 4661 | 4871 | 5081 | 5291 | 5501 | 5711 | 5921 |
| 171915     | <i>Gallus</i>  | 2017 Feb        | 40       | Donzacq                     | MN87         | MN87 | MN87 | MN87 | MN87 | MN87 | MN87 | MN87 |
|            | <i>Gallus</i>  | 21              |          |                             | 4452         | 4662 | 4872 | 5082 | 5292 | 5502 | 5712 | 5922 |
| 171928     | domestic duck  | 2017 Mar        | 40       | Gaujacq                     | MN87         | MN87 | MN87 | MN87 | MN87 | MN87 | MN87 | MN87 |
|            |                | 2               |          |                             | 4453         | 4663 | 4873 | 5083 | 5293 | 5503 | 5713 | 5923 |
| 171929     | domestic duck  | 2017 Feb        | 40       | Gaujacq                     | MN87         | MN87 | MN87 | MN87 | MN87 | MN87 | MN87 | MN87 |
|            |                | 24              |          |                             | 4454         | 4664 | 4874 | 5084 | 5294 | 5504 | 5714 | 5924 |
| 171932     | domestic duck  | 2017 Feb        | 40       | Saint-Saturnin              | MN87         | MN87 | MN87 | MN87 | MN87 | MN87 | MN87 | MN87 |
|            |                | 24              |          |                             | 4455         | 4665 | 4875 | 5085 | 5295 | 5505 | 5715 | 5925 |
| 171953     | domestic goose | 2017 Jun        | 69       | Saint-Étienne-des-Oullières | MN87         | MN87 | MN87 | MN87 | MN87 | MN87 | MN87 | MN87 |
|            |                | 20              |          |                             | 4487         | 4697 | 4907 | 5117 | 5327 | 5537 | 5747 | 5957 |
| 171960     | swan           | 2017 Jun        | 88       | Archettes                   | MN87         | MN87 | MN87 | MN87 | MN87 | MN87 | MN87 | MN87 |
|            |                | 23              |          |                             | 4485         | 4695 | 4905 | 5115 | 5325 | 5535 | 5745 | 5955 |
| 172002     | <i>Gallus</i>  | 2017 Feb        | 40       | Misson                      | MN87         | MN87 | MN87 | MN87 | MN87 | MN87 | MN87 | MN87 |
|            | <i>Gallus</i>  | 25              |          |                             | 4456         | 4666 | 4876 | 5086 | 5296 | 5506 | 5716 | 5926 |
| 172003     | <i>Gallus</i>  | 2017 Feb        | 40       | Hauriet                     | MN87         | MN87 | MN87 | MN87 | MN87 | MN87 | MN87 | MN87 |
|            | <i>Gallus</i>  | 25              |          |                             | 4457         | 4667 | 4877 | 5087 | 5297 | 5507 | 5717 | 5927 |
| 172004     | domestic duck  | 2017 Feb        | 40       | Peyrehorade                 | MN87         | MN87 | MN87 | MN87 | MN87 | MN87 | MN87 | MN87 |
|            |                | 25              |          |                             | 4458         | 4668 | 4878 | 5088 | 5298 | 5508 | 5718 | 5928 |
| 172012     | domestic duck  | 2017 Feb        | 40       | Bénesse-Mareme              | MN87         | MN87 | MN87 | MN87 | MN87 | MN87 | MN87 | MN87 |
|            |                | 23              |          |                             | 4459         | 4669 | 4879 | 5089 | 5299 | 5509 | 5719 | 5929 |
| 172038     | domestic duck  | 2017 Feb        | 47       | Villefranche-du-Queyran     | MN87         | MN87 | MN87 | MN87 | MN87 | MN87 | MN87 | MN87 |
|            |                | 27              |          |                             | 4460         | 4670 | 4880 | 5090 | 5300 | 5510 | 5720 | 5930 |
| 172057     | domestic duck  | 2017 Feb        | 64       | Moncayolle                  | MN87         | MN87 | MN87 | MN87 | MN87 | MN87 | MN87 | MN87 |
|            |                | 27              |          |                             | 4461         | 4671 | 4881 | 5091 | 5301 | 5511 | 5721 | 5931 |

| Sample no. | Host          | Collection date | Dept no. | Location                   | Gene segment |      |      |      |      |      |      |      |
|------------|---------------|-----------------|----------|----------------------------|--------------|------|------|------|------|------|------|------|
|            |               |                 |          |                            | PB2          | PB1  | PA   | HA   | NP   | NA   | M    | NS   |
| 172092     | <i>Gallus</i> | 2017 Feb 28     | 40       | Gaujacq                    | MN87         | MN87 | MN87 | MN87 | MN87 | MN87 | MN87 | MN87 |
|            | <i>Gallus</i> |                 |          |                            | 4462         | 4672 | 4882 | 5092 | 5302 | 5512 | 5722 | 5932 |
| 172093     | <i>Gallus</i> | 2017 Feb 28     | 40       | Doazit                     | MN87         | MN87 | MN87 | MN87 | MN87 | MN87 | MN87 | MN87 |
|            | <i>Gallus</i> |                 |          |                            | 4463         | 4673 | 4883 | 5093 | 5303 | 5513 | 5723 | 5933 |
| 172094     | domestic duck | 2017 Mar 1      | 40       | Saint-Jean-de-Marsacq      | MN87         | MN87 | MN87 | MN87 | MN87 | MN87 | MN87 | MN87 |
|            |               |                 |          |                            | 4464         | 4674 | 4884 | 5094 | 5304 | 5514 | 5724 | 5934 |
| 172096     | domestic duck | 2017 Mar 1      | 64       | Bugnein                    | MN87         | MN87 | MN87 | MN87 | MN87 | MN87 | MN87 | MN87 |
|            |               |                 |          |                            | 4465         | 4675 | 4885 | 5095 | 5305 | 5515 | 5725 | 5935 |
| 172137     | <i>Gallus</i> | 2017 Mar 2      | 40       | Doazit                     | MN87         | MN87 | MN87 | MN87 | MN87 | MN87 | MN87 | MN87 |
|            | <i>Gallus</i> |                 |          |                            | 4466         | 4676 | 4886 | 5096 | 5306 | 5516 | 5726 | 5936 |
| 172144     | domestic duck | 2017 Feb 27     | 40       | Saint-Étienne-d'Orthe      | MN87         | MN87 | MN87 | MN87 | MN87 | MN87 | MN87 | MN87 |
|            |               |                 |          |                            | 4467         | 4677 | 4887 | 5097 | 5307 | 5517 | 5727 | 5937 |
| 172182     | domestic duck | 2017 Mar 1      | 40       | Saint-Lon-les-Mines        | MN87         | MN87 | MN87 | MN87 | MN87 | MN87 | MN87 | MN87 |
|            |               |                 |          |                            | 4468         | 4678 | 4888 | 5098 | 5308 | 5518 | 5728 | 5938 |
| 172287     | <i>Gallus</i> | 2017 Mar 7      | 64       | Bidache                    | MN87         | MN87 | MN87 | MN87 | MN87 | MN87 | MN87 | MN87 |
|            | <i>Gallus</i> |                 |          |                            | 4469         | 4679 | 4889 | 5099 | 5309 | 5519 | 5729 | 5939 |
| 172289     | domestic duck | 2017 Mar 4      | 64       | Came                       | MN87         | MN87 | MN87 | MN87 | MN87 | MN87 | MN87 | MN87 |
|            |               |                 |          |                            | 4470         | 4680 | 4890 | 5100 | 5310 | 5520 | 5730 | 5940 |
| 172331     | domestic duck | 2017 Mar 13     | 64       | Oraàs                      | MN87         | MN87 | MN87 | MN87 | MN87 | MN87 | MN87 | MN87 |
|            |               |                 |          |                            | 4471         | 4681 | 4891 | 5101 | 5311 | 5521 | 5731 | 5941 |
| 172362     | domestic duck | 2017 Mar 18     | 64       | Saint-Gladie-Arrive-Munein | MN87         | MN87 | MN87 | MN87 | MN87 | MN87 | MN87 | MN87 |
|            |               |                 |          |                            | 4472         | 4682 | 4892 | 5102 | 5312 | 5522 | 5732 | 5942 |
| 172383     | <i>Gallus</i> | 2017 Mar 21     | 64       | Saint-Gladie-Arrive-Munein | MN87         | MN87 | MN87 | MN87 | MN87 | MN87 | MN87 | MN87 |
|            | <i>Gallus</i> |                 |          |                            | 4473         | 4683 | 4893 | 5103 | 5313 | 5523 | 5733 | 5943 |
| 172384     | domestic duck | 2017 Mar 22     | 64       | Monfort                    | MN87         | MN87 | MN87 | MN87 | MN87 | MN87 | MN87 | MN87 |
|            |               |                 |          |                            | 4474         | 4684 | 4894 | 5104 | 5314 | 5524 | 5734 | 5944 |
| 172390     | domestic duck | 2017 Mar 21     | 64       | Castelnau                  | MN87         | MN87 | MN87 | MN87 | MN87 | MN87 | MN87 | MN87 |
|            |               |                 |          |                            | 4475         | 4685 | 4895 | 5105 | 5315 | 5525 | 5735 | 5945 |
| 172394     | domestic duck | 2017 Mar 21     | 64       | Préchacq-Navarrenx         | MN87         | MN87 | MN87 | MN87 | MN87 | MN87 | MN87 | MN87 |
|            |               |                 |          |                            | 4476         | 4686 | 4896 | 5106 | 5316 | 5526 | 5736 | 5946 |
| 172610     | <i>Gallus</i> | 2017 Jun 26     | 59       | Grillon                    | MN87         | MN87 | MN87 | MN87 | MN87 | MN87 | MN87 | MN87 |
|            | <i>Gallus</i> |                 |          |                            | 4477         | 4687 | 4897 | 5107 | 5317 | 5527 | 5737 | 5947 |

\*Accession nos. for samples 161104,161108 from GISAID. Accession nos. of remaining samples from Genbank. Dept, department; HA, hemagglutinin; M, matrix protein; NA, neuraminidase; NP, nucleoprotein; NS, nonstructural protein; PA, polymerase acidic protein; PB1, polymerase basic 1 protein; PB2, polymerase basic 2 protein.

†Most domestic ducks used for foie gras production are a hybrid of Muscovy (*Cairina moschata*) and Pekin ducks.

**Appendix Table 2.** Highly pathogenic influenza A(H5N8) virus from wild and domestic birds, France\*

| Species                           | Detected            |           |            | Sequenced           |           |            |          |          |            |
|-----------------------------------|---------------------|-----------|------------|---------------------|-----------|------------|----------|----------|------------|
|                                   | Setting             |           | Total      | Setting             |           | Genotype   |          |          | Total      |
|                                   | Southwestern France | Other     |            | Southwestern France | Other     | A          | B        | C        |            |
| <b>Wild birds</b>                 |                     |           |            |                     |           |            |          |          |            |
| Gull                              | 1                   | 2         | 3          | 0                   | 1         | 0          | 1        | 0        | 1          |
| Magpie                            | 1                   | 0         | 1          | 0                   | 0         | NA         | NA       | NA       | 0          |
| Pigeon/dove                       | 4                   | 0         | 4          | 0                   | 0         | NA         | NA       | NA       | 0          |
| Eurasian wigeon                   | 0                   | 1         | 1          | 0                   | 1         | 0          | 1        | 0        | 1          |
| Swan                              | 0                   | 25        | 25         | 0                   | 8         | 0          | 3        | 5        | 8          |
| Common buzzard                    | 7                   | 0         | 7          | 4                   | 0         | 4          | 0        | 0        | 4          |
| Kestrel                           | 1                   | 0         | 1          | 1                   | 0         | 1          | 0        | 0        | 1          |
| Heron/egret                       | 2                   | 3         | 5          | 0                   | 0         | NA         | NA       | NA       | 0          |
| Song thrush                       | 1                   | 0         | 1          | 0                   | 0         | NA         | NA       | NA       | 0          |
| Goose                             | 0                   | 3         | 3          | 0                   | 0         | NA         | NA       | NA       | 0          |
| <b>Subtotal</b>                   | <b>17</b>           | <b>34</b> | <b>51</b>  | <b>5</b>            | <b>10</b> | <b>5</b>   | <b>5</b> | <b>5</b> | <b>15</b>  |
| <b>Domestic and captive birds</b> |                     |           |            |                     |           |            |          |          |            |
| Duck                              | 388                 | 3         | 391        | 164                 | 0         | 163        | 0        | 1        | 164        |
| Chicken                           | 52                  | 2         | 54         | 22                  | 2         | 22         | 2        | 0        | 24         |
| Goose                             | 4                   | 2         | 6          | 2                   | 1         | 2          | 0        | 1        | 3          |
| Guinea fowl                       | 2                   | 0         | 2          | 1                   | 0         | 1          | 0        | 0        | 1          |
| Turkey                            | 0                   | 1         | 1          | 1                   | 0         | 1          | 0        | 0        | 1          |
| Unknown/other/multispecies        | 33                  | 1         | 34         | 3                   | 1         | 3          | 1        | 0        | 4          |
| <b>Subtotal</b>                   | <b>479</b>          | <b>9</b>  | <b>488</b> | <b>193</b>          | <b>4</b>  | <b>192</b> | <b>3</b> | <b>2</b> | <b>197</b> |

\*NA, not applicable.
