# Supplementary material for: Phylodynamic analysis of the highly pathogenic avian influenza H5N8 epidemic in France, 2016–2017
Source: PubMed Central journal article supplement — Transbound Emerg Dis. 2022 Mar 7;69(5):e1574–83. doi: 10.1111/tbed.14490 (PMC9790735; doi:10.1111/tbed.14490), 2022-03-07

**S4 Figure.** A scatter plot depicting a strong positive Pearson correlation between sample size and case counts in each *département* during the HPAI H5N8 outbreaks of 2016-17 in southwest France.

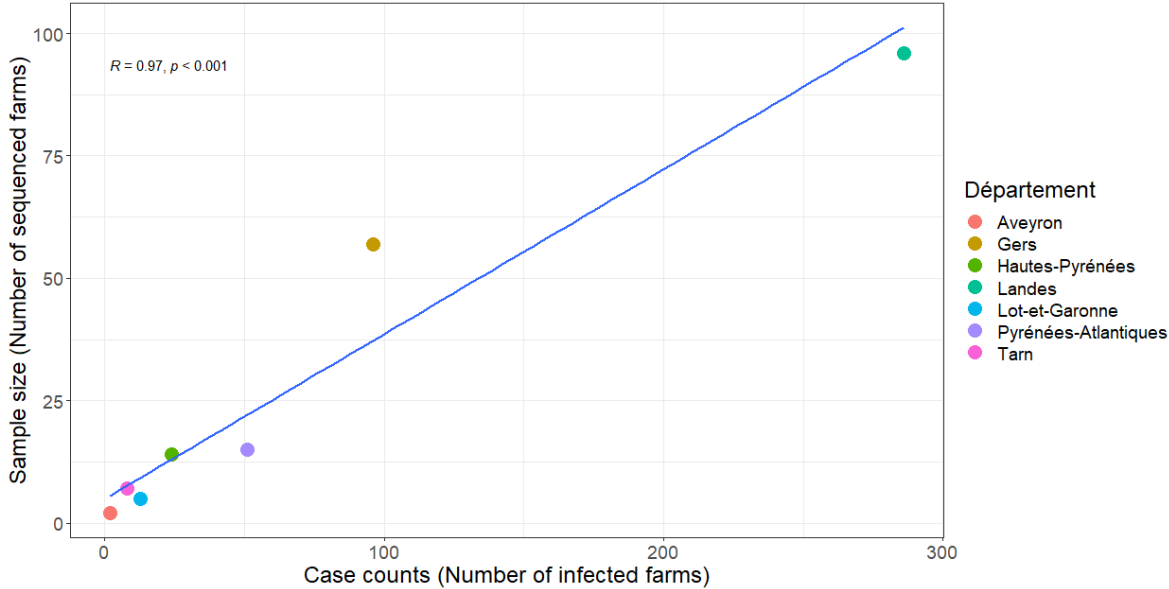

Supplement: TBED-69-e1574-s004.pdf [file TBED-69-e1574-s004.pdf]
