# Supplementary material for: Phylodynamic analysis of the highly pathogenic avian influenza H5N8 epidemic in France, 2016–2017
Source: PubMed Central journal article supplement — Transbound Emerg Dis. 2022 Mar 7;69(5):e1574–83. doi: 10.1111/tbed.14490 (PMC9790735; doi:10.1111/tbed.14490), 2022-03-07
Supplement: TBED-69-e1574-s005.pdf [file TBED-69-e1574-s005.pdf]

## Legends to the supplementary materials

Manuscript title: Phylodynamic analysis of the highly pathogenic avian influenza H5N8 epidemic in France, 2016-17

Journal: Transboundary and Emerging Diseases

**S1.** A heat map depicting multi-collinearity between linear predictors of the viral effective population size  $N_e$  GLM during the HPAI H5N8 outbreaks of 2016-17 in southwest France. Each cube depicts the range of the Pearson correlation coefficient ( $\rho$ ) between a pair of predictors. Darker colour represents stronger positive correlations.

**S2.** Accession numbers and numbers of sequences of the HPAI H5N8 outbreaks of 2016-17 in southwest France. Source: <https://doi.org/10.3201/eid2702.202920>

**S3.** Metadata of samples from the HPAI H5N8 outbreaks of 2016-17 in southwest France.

**S4.** A scatter plot depicting a strong positive Pearson correlation between sample size and case counts in each département during the HPAI H5N8 outbreaks of 2016-17 in southwest France.
